# Supplementary material for: Microfluidic system for monitoring temporal variations of hemorheological properties and platelet adhesion in LPS-injected rats
Source: PubMed Central journal article supplement (PMC5431819; doi:10.1038/s41598-017-01985-w), 2017-05-11
Supplement: 41598_2017_1985_MOESM1_ESM.pdf [file 41598_2017_1985_MOESM1_ESM.pdf]

# Microfluidic system for monitoring temporal variations of hemorheological properties and platelet adhesion in LPS-injected rats

Eunseop Yeom<sup>1</sup>, Hye Mi Kim<sup>2</sup>, Jun Hong Park<sup>3</sup>, Woorak Choi<sup>3</sup>,

Junsang Doh<sup>2</sup> and Sang Joon Lee<sup>3\*</sup>

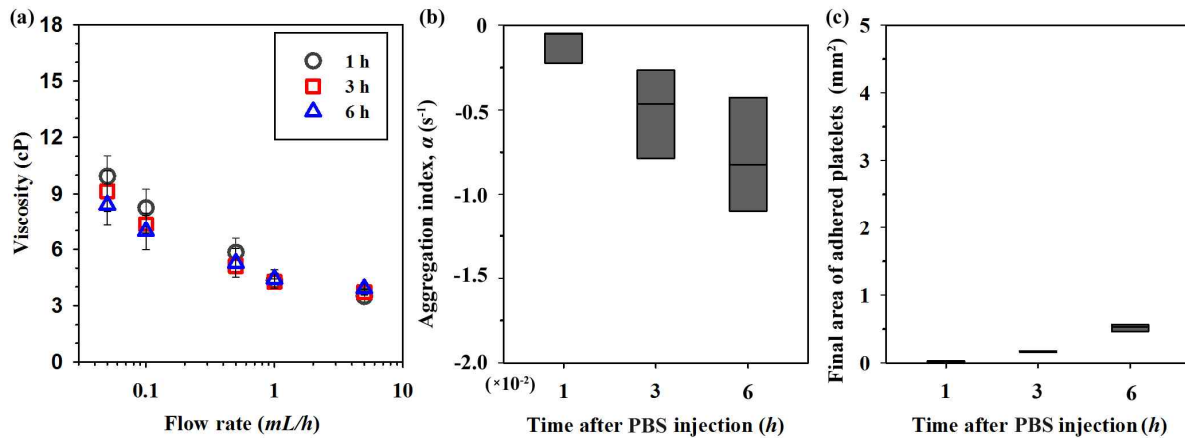

**Supplementary Fig. s1** Temporal variations of biophysical properties for non-LPS injection group. (a) Variations of blood viscosity according to flow rate at 1, 3 and 6 h after injecting PBS into the rat extracorporeal model. Comparison of (b) aggregation index ( $\alpha$ ) and (c) final area of adhered platelets at 250 s after PBS injection (1, 3, and 6 h). Decrease in blood viscosity and RBC aggregability with the lapse of time may be related with reduced concentration of heparin in blood.
